# Supplementary figures and images for: Anubis: Bayesian optimization with unknown feasibility constraints for scientific experimentation
Source: Royal Society of Chemistry journal article supplement (doi:10.1039/d5dd00018a), 2025-01-01

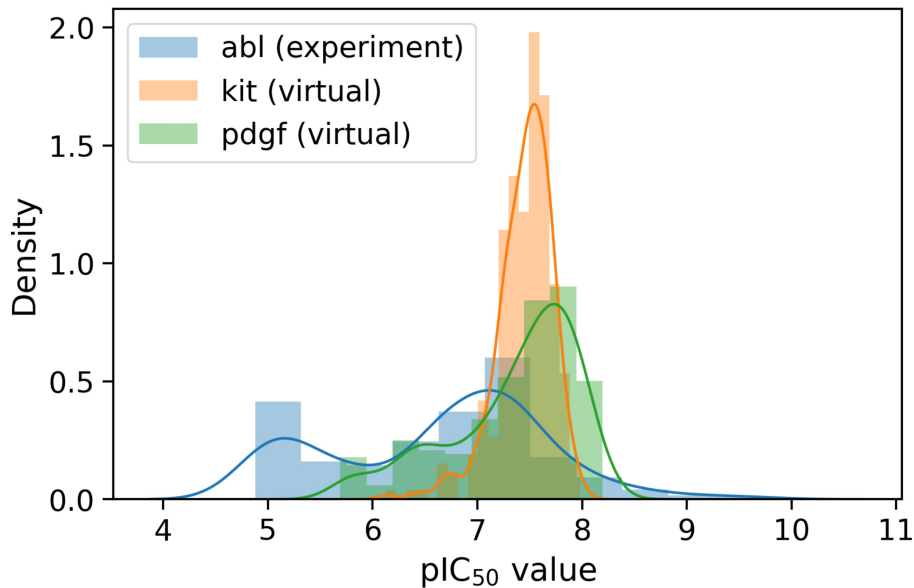

Supplement: d5dd00018a10.pdf [file d5dd00018a10.pdf]

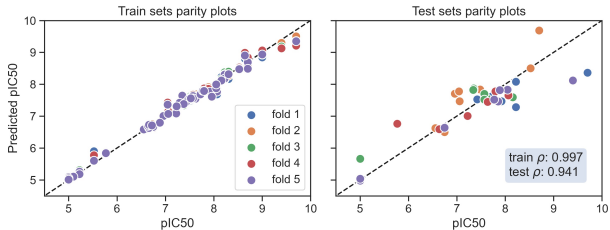

Supplement: d5dd00018a8.pdf [file d5dd00018a8.pdf]
